# Supplementary material for: Ly6D+Siglec-H+ precursors contribute to conventional dendritic cells via a Zbtb46+Ly6D+ intermediary stage
Source: Springer Nature journal article supplement (doi:10.1038/s41467-022-31054-4), 2022-06-16

## Supplementary Data and Tables

Supplementary Data 1 is provided as a separate .xlsx file.

### Supplementary Data 1: Enriched KEGG pathways

Supplementary Data 2 is provided as a separate .xlsx file.

### Supplementary Data 2: Enriched TF motifs

| Gene    | Assay Number       | Transcript detected | Dye | Lot       | Manufacturer |
|---------|--------------------|---------------------|-----|-----------|--------------|
| Batf3   | Mm01318274_m1      | NM_030060.2         | FAM | 610932    | ThermoFisher |
| Cd74    | Mm00658576_m1      | NM_001042605.1      | FAM | 3847897   | ThermoFisher |
| Cx3cr1  | Mm00438354_m1      | NM_009987.4         | FAM | 816513    | ThermoFisher |
| HPRT    | Mm.PT.39a.22214828 | NM_013556           | HEX | 365840192 | IDT          |
| Id2     | Mm00711781_m1      | NM_010496.3         | FAM | 854994    | ThermoFisher |
| Irf4    | Mm00516431_m1      | NM_013674.1         | FAM | 1204526   | ThermoFisher |
| Irf8    | Mm00492567_m1      | AK018533.1          | FAM | 854037    | ThermoFisher |
| Itgam   | Mm00434455_m1      | NM_001082960.1      | FAM | 3623266   | ThermoFisher |
| Itgax   | Mm01271280_m1      | NM_021334.2         | FAM | P210119   | ThermoFisher |
| Klf4    | Mm00516104_m1      | NM_010637.3         | FAM | 3473212   | ThermoFisher |
| Ly6d    | Mm00521959_m1      | NM_010742.1         | FAM | P210119   | ThermoFisher |
| Siglech | Mm00618627_m1      | NM_178706.4         | FAM | 572659    | ThermoFisher |
| Sfp1    | Mm00488142_m1      | NM_011355.1         | FAM | 887886    | ThermoFisher |
| Spib    | Mm01719550_s1      | NM_019866.1         | FAM | 735002    | ThermoFisher |
| Stat3   | Mm01219775_m1      | NM_011486.4         | FAM | 1206368   | ThermoFisher |
| Tcf4    | Mm01262526_g1      | NM_001083967.1      | FAM | P100419   | ThermoFisher |
| Zbtb46  | Mm00511327_m1      | NM_027656.2         | FAM | P210119   | ThermoFisher |
| Zeb2    | Mm00658576_m1      | NM_001289521.1      | FAM | P210119   | ThermoFisher |

### Supplementary Table 1: qPCR Taqman™ Probes used in this study

| Target | Fluorophore | Clone      | Dilution | Manufacturer |
|--------|-------------|------------|----------|--------------|
| B220   | BV605       | RA3-6B2    | 1:200    | BioLegend    |
| B220   | FITC        | RA2-6B2    | 1:200    | eBioscience  |
| B220   | BV605       | RA3-6B2    | 1:200    | BD           |
| BST-2  | APC         | eBio129c   | 1:200    | eBioscience  |
| CCR4   | PE          | 2G12       | 1:200    | BioLegend    |
| CCR5   | BUV737      | 2D7/CCR5   | 1:100    | BD           |
| CCR5   | PE          | HM-CCR5    | 1:200    | BioLegend    |
| CCR9   | PE          | eBioCW-1.2 | 1:200    | eBioscience  |
| CCR9   | eF450       | CW-1.2     | 1:100    | eBioscience  |
| CD115  | PE-Cy7      | AFS98      | 1:200    | BioLegend    |
| CD115  | BUV737      | AFS98      | 1:200    | BD           |
| CD115  | APC         | AFS98      | 1:200    | BioLegend    |
| CD117  | BV510       | ACK2       | 1:200    | BioLegend    |
| CD117  | PE          | 2B8        | 1:200    | BioLegend    |

|            |                 |           |       |             |
|------------|-----------------|-----------|-------|-------------|
| CD11b      | APC             | M1/70     | 1:200 | BioLegend   |
| CD11b      | PerCP-Cy5,5     | M1/70     | 1:200 | BioLegend   |
| CD11b      | BV570           | M1/70     | 1:200 | BioLegend   |
| CD11c      | PE-Cy7          | N418      | 1:200 | BioLegend   |
| CD11c      | PE-Cy7          | N418      | 1:200 | eBioscience |
| CD11c      | APC-Cy7         | HL3       | 1:200 | BD          |
| CD11c      | BUV395          | HL3       | 1:200 | BD          |
| CD135/Flt3 | APC             | A2F10     | 1:100 | BioLegend   |
| CD135/Flt3 | BV421           | A2F10     | 1:100 | BioLegend   |
| CD14       | PE              | Sa2-8     | 1:200 | BioLegend   |
| CD16/32    | PerCP-Cy5,5     | 93        | 1:200 | BioLegend   |
| CD16/32    | BUV496          | 93        | 1:200 | BD          |
| CD19       | APC-Cy7         | 6D5       | 1:200 | BioLegend   |
| CD19       | FITC            | 1D3       | 1:200 | BD          |
| CD2        | BUV615          | RM2-5     | 1:100 | BD          |
| CD24       | APC             | M1/69     | 1:200 | BioLegend   |
| CD24       | BV605           | M1/69     | 1:200 | BioLegend   |
| CD3        | APC-Cy7         | 145-2C11  | 1:200 | BioLegend   |
| CD3        | FITC            | 145-2C11  | 1:200 | BD          |
| CD4        | APC             | RM4-5     | 1:200 | BioLegend   |
| CD4        | BUV661          | SK3       | 1:200 | BD          |
| CD45.1     | PE-Cy7          | A20       | 1:200 | eBioscience |
| CD45.1     | AF700           | A20       | 1:200 | BioLegend   |
| CD45.2     | APC             | 104       | 1:200 | BioLegend   |
| CD45.2     | Alexa Flour 700 | 104       | 1:200 | BioLegend   |
| CD64       | APC             | X54-5/7.1 | 1:200 | BioLegend   |
| CD81       | Alexa 350       | 431301    | 1:200 | Novus Bio   |
| CD86       | BV650           | GL-1      | 1:200 | BioLegend   |
| CD8a       | PerCP           | 53-6.7    | 1:200 | eBioscience |
| CD8a       | PE              | 53-6.7    | 1:200 | BD          |
| CD9        | APC             | eBioKMC8  | 1:200 | eBioscience |
| CX3CR1     | BV711           | SA011F11  | 1:200 | BioLegend   |
| CX3CR1     | PE              | SA011F11  | 1:200 | BioLegend   |
| CXCR3      | PerCP           | CXCR3-173 | 1:100 | eBioscience |
| CXCR4      | APC             | 2B11      | 1:200 | eBioscience |
| CXCR5      | APC             | L138D7    | 1:200 | BioLegend   |
| F480       | BUV805          | T45-2342  | 1:400 | BD          |
| IL7R/CD127 | PerCP-Cy5.5     | A7R34     | 1:200 | BioLegend   |
| IL7R/CD127 | PE-Cy7          | A7R34     | 1:200 | BioLegend   |
| Ly49Q      | FITC            | 2E6       | 1:200 | MBL         |
| Ly6C       | PE-Dazzle594    | HK1.4     | 1:400 | BioLegend   |
| Ly6C       | AF700           | HK1.4     | 1:200 | BioLegend   |
| Ly6D       | PE              | 49-H4     | 1:800 | BioLegend   |

|            |                 |             |       |             |
|------------|-----------------|-------------|-------|-------------|
| Ly6G       | APC-Cy7         | 1A8         | 1:200 | BioLegend   |
| Ly6G       | FITC            | 1A8         | 1:200 | BioLegend   |
| MHCII      | APC-eFluor780   | M5/114.15.2 | 1:400 | eBioscience |
| MHCII      | BV650           | M5/114.15.2 | 1:400 | BioLegend   |
| MHCII      | BV650           | M5/114.15.2 | 1:400 | eBioscience |
| MHCII      | Spark Blue 550  | M5/114.15.2 | 1:400 | BioLegend   |
| NK1.1      | APC-Cy7         | PK136       | 1:200 | BioLegend   |
| NK1.1      | FITC            | PK136       | 1:200 | BD          |
| Sca1       | APC             | D7          | 1:200 | BioLegend   |
| Siglec-H   | BV786           | 440c        | 1:200 | BD          |
| Siglec-H   | AF488           | 440c        | 1:200 | BioLegend   |
| Siglec-H   | FITC            | 440c        | 1:200 | BioLegend   |
| Siglec-H   | AF647           | 440c        | 1:200 | BioLegend   |
| Sirp-alpha | PerCP-Cy5.5     | P84         | 1:200 | BioLegend   |
| Sirp-alpha | Alexa Flour 700 | P84         | 1:200 | BioLegend   |
| Ter119     | APC-Cy7         | TER-119     | 1:200 | BioLegend   |
| Ter119     | FITC            | TER-119     | 1:200 | BioLegend   |
| XCR1       | Alexa Flour 647 | ZET         | 1:200 | BioLegend   |

**Supplementary Table 2: Antibodies used in this study**

## Supplementary Methods

### IFN- $\alpha$ ELISA

For IFN- $\alpha$  production assays Ly6D<sup>+</sup> Zbtb46<sup>-</sup> lo-lo and lo-hi cells were sorted, cultured on EL08-1D2 stromal cells with 3% Flt3L containing SN for 3d followed by stimulation with 0,5  $\mu$ M CpG-A for 24h. SNs from stimulated lo-lo, lo-hi and EL08 cells as control were analyzed for IFN- $\alpha$  concentration using a high-sensitivity VeriKine™-HS Mouse Interferon Alpha All Subtype ELISA Kit (pbl assay science, Cat. No: 42115-1) according to the manufacturers protocol. ELISA data were analyzed in Prism utilizing a 4-parameter logistical fit for the standard curve as proposed in the manufacturers protocol.

### CDP/Ly6D<sup>+</sup> Siglec-H<sup>+</sup> LP sort

CDP and Ly6D<sup>+</sup> Siglec-H<sup>+</sup> LP were sorted from Lin<sup>-</sup> (CD3, CD19, CD105, NK1.1, Ly6G) CD16/32<sup>-</sup> CD11c<sup>-</sup> B220<sup>-</sup> Ly6C<sup>-</sup> CD135<sup>+</sup> CD117<sup>lo-int</sup> BM cells of Zbtb46-eGFP<sup>wt/ki</sup> mice. CDP were sorted as CD115<sup>+</sup> IL7R<sup>-</sup> and Ly6D<sup>+</sup> Siglec-H<sup>+</sup> LP were sorted as CD115<sup>-</sup> IL7R<sup>+</sup> Ly6D<sup>+</sup> Siglec-H<sup>+</sup>. CDP were cultured on EL08-1D2 stromal cells with 5% Flt3L containing SN for 4d. Ly6D<sup>+</sup> Siglec-H<sup>+</sup> LP were cultured without stromal cells in 96-well plates with 10% Flt3L containing SN for 4d, then analyzed by flow cytometry.

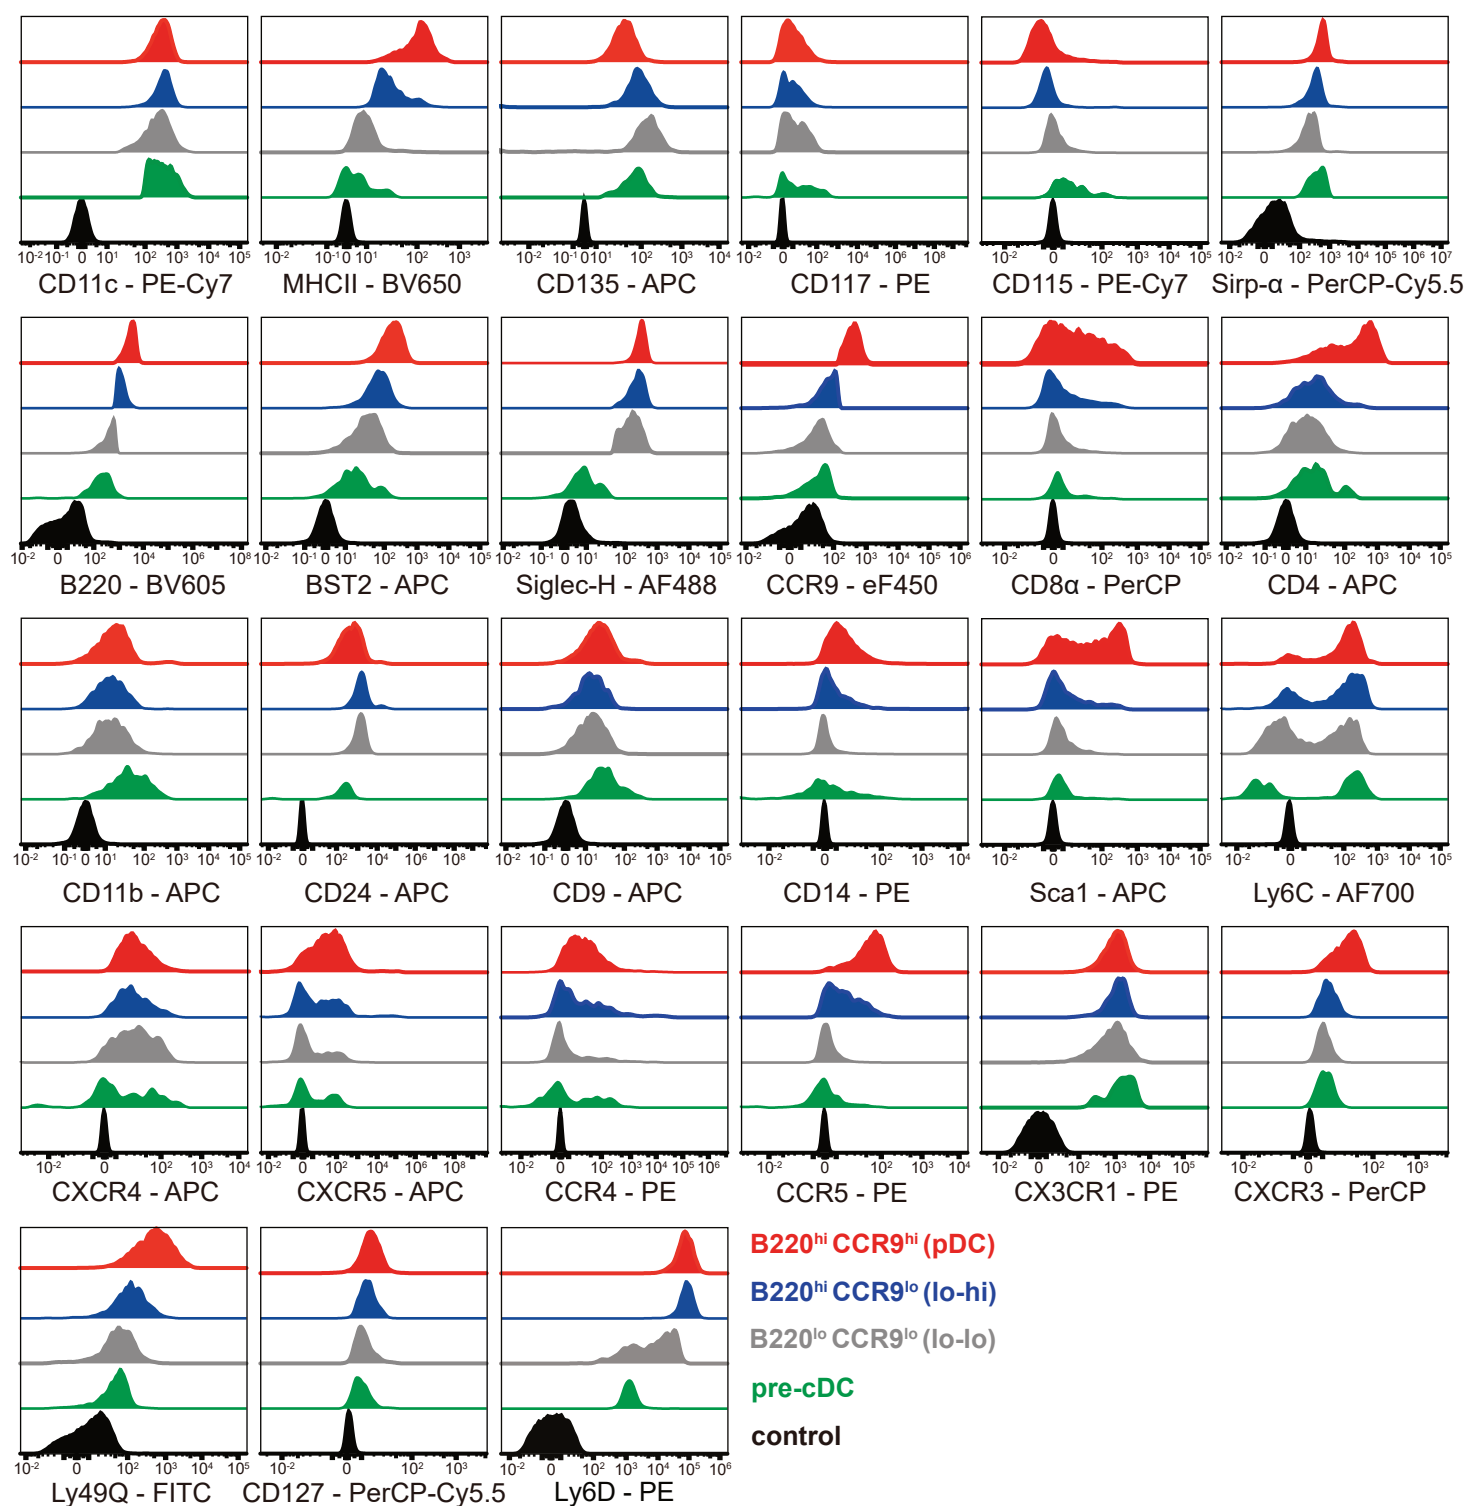

**Supplementary Figure 1. Surface marker expression in pDCs and precursor subsets**

Comparison of surface marker expression in pre-cDC, lo-lo, lo-hi and pDC in the BM of C57BL/6 mice. BM single cell suspensions were stained with fluorescently labeled antibodies against the indicated cell surface markers as described in the methods section without prior enrichment steps. Histograms showing fluorescence intensity of surface markers measured by flow cytometry (normalized to mode, unstained cells as control). Representative results of 3 independent experiments.

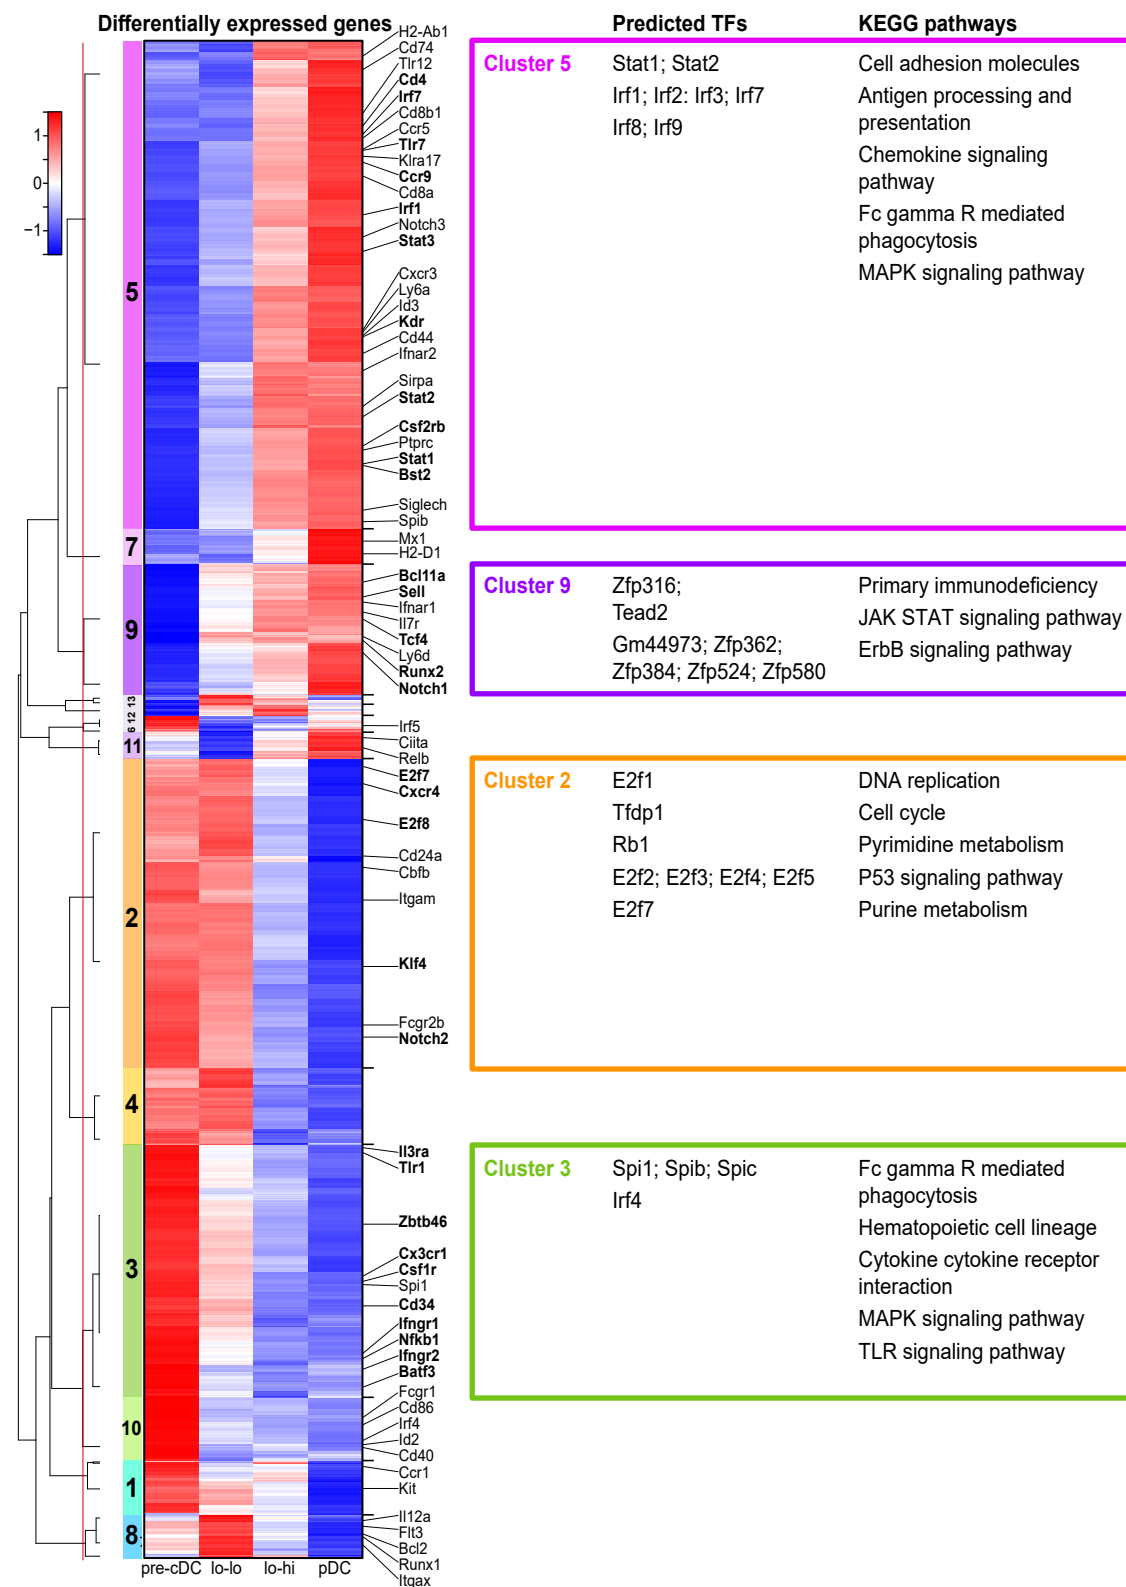

**Supplementary Figure 2. Gene expression heatmap of DC precursors**

pre-cDC, lo-lo, lo-hi and pDC were sorted from the BM cells of 3 individual C57BL/6 mice and processed for RNA-sequencing. Expression heatmap of DEG, hierarchically clustered by Euclidean distances between scaled mean values (normalized counts). Left panel: Heatmap of 2880 DEGs (likelihood ratio test, Benjamini-Hochberg adjusted p value < 0.01) with 13 clusters of co-regulated genes. Genes in bold letters are known targets for the transcription factors (TFs) shown on the right. Colors indicate row z-scores. Right panel: Shown are the known TFs that bind to motifs enriched in the major clusters (selected for highest enrichment scores for each cluster) and selected KEGG functional pathways enriched in the major clusters.

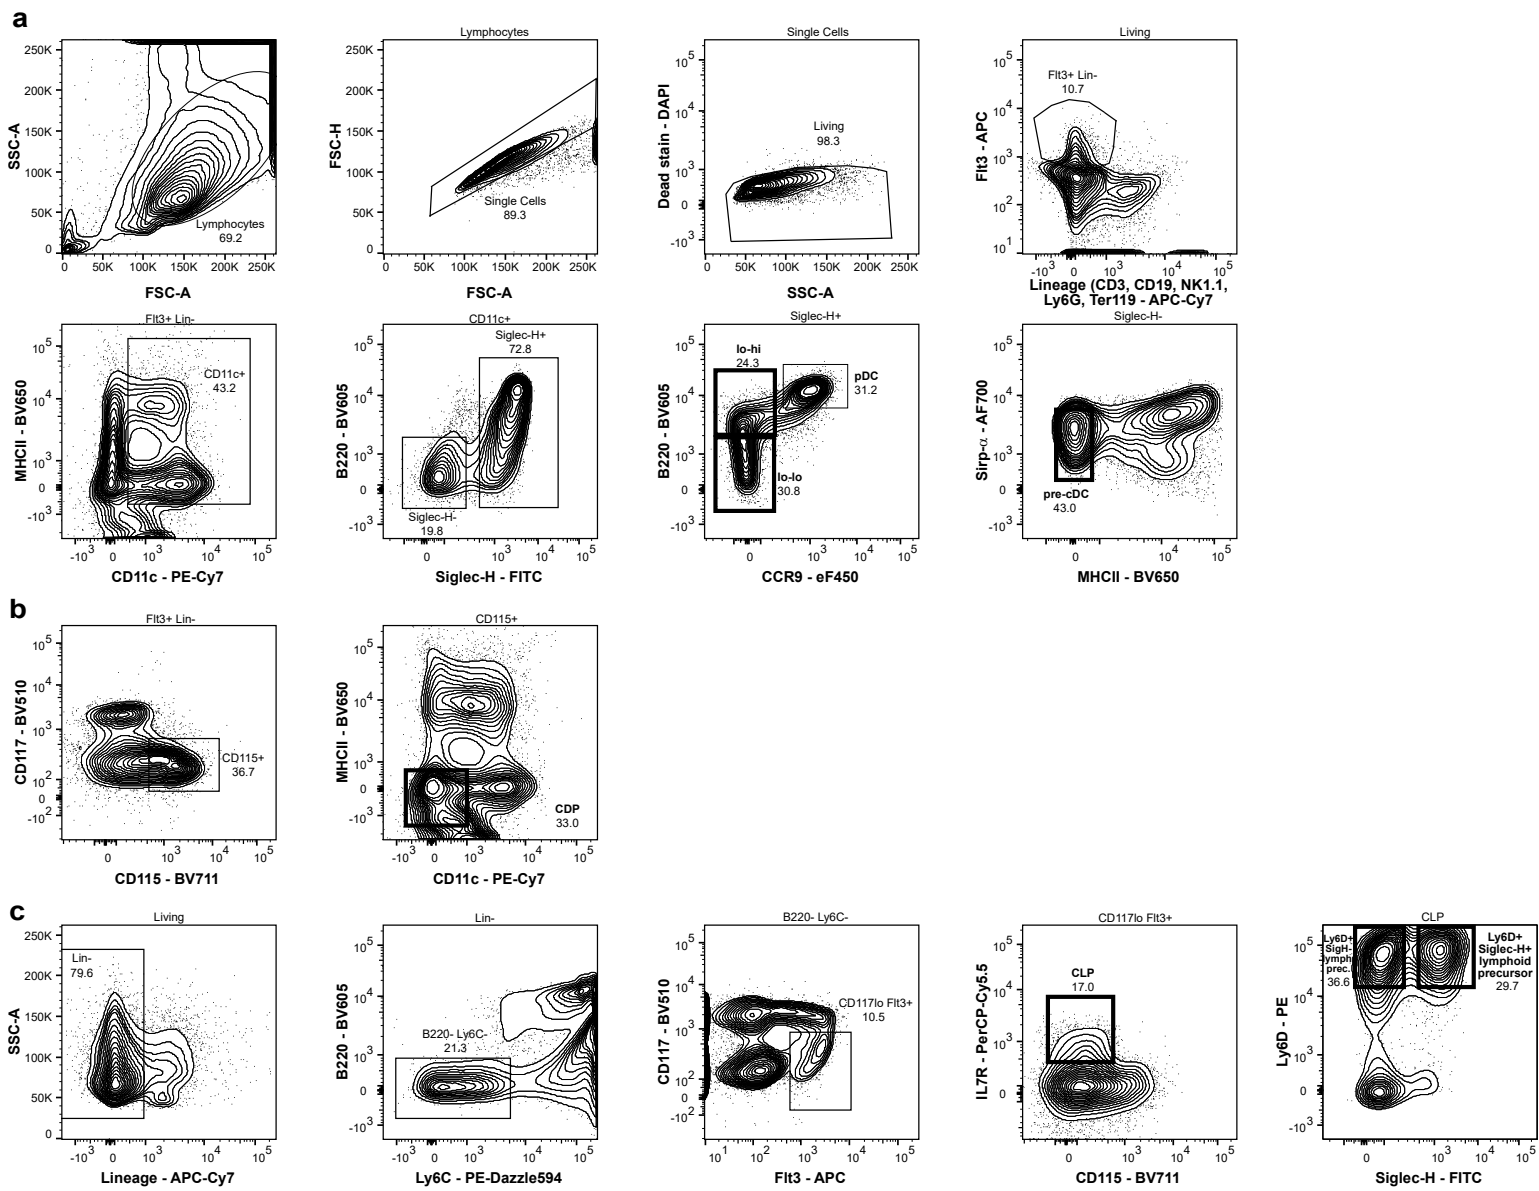

### Supplementary Figure 3. Gating strategy for sort populations for scRNA-sequencing

The following cell populations were sorted from Lineage-depleted BM cells: (a) lo-lo, lo-hi, pDC and pre-cDC. (b) CDP. (c) CLP, Ly6D<sup>+</sup> and Ly6D<sup>+</sup> Siglec-H<sup>+</sup> lymphoid progenitors. Gating strategies are depicted from left to right, followed by the next row, where applicable. Parent gates are indicated above the contour plots.

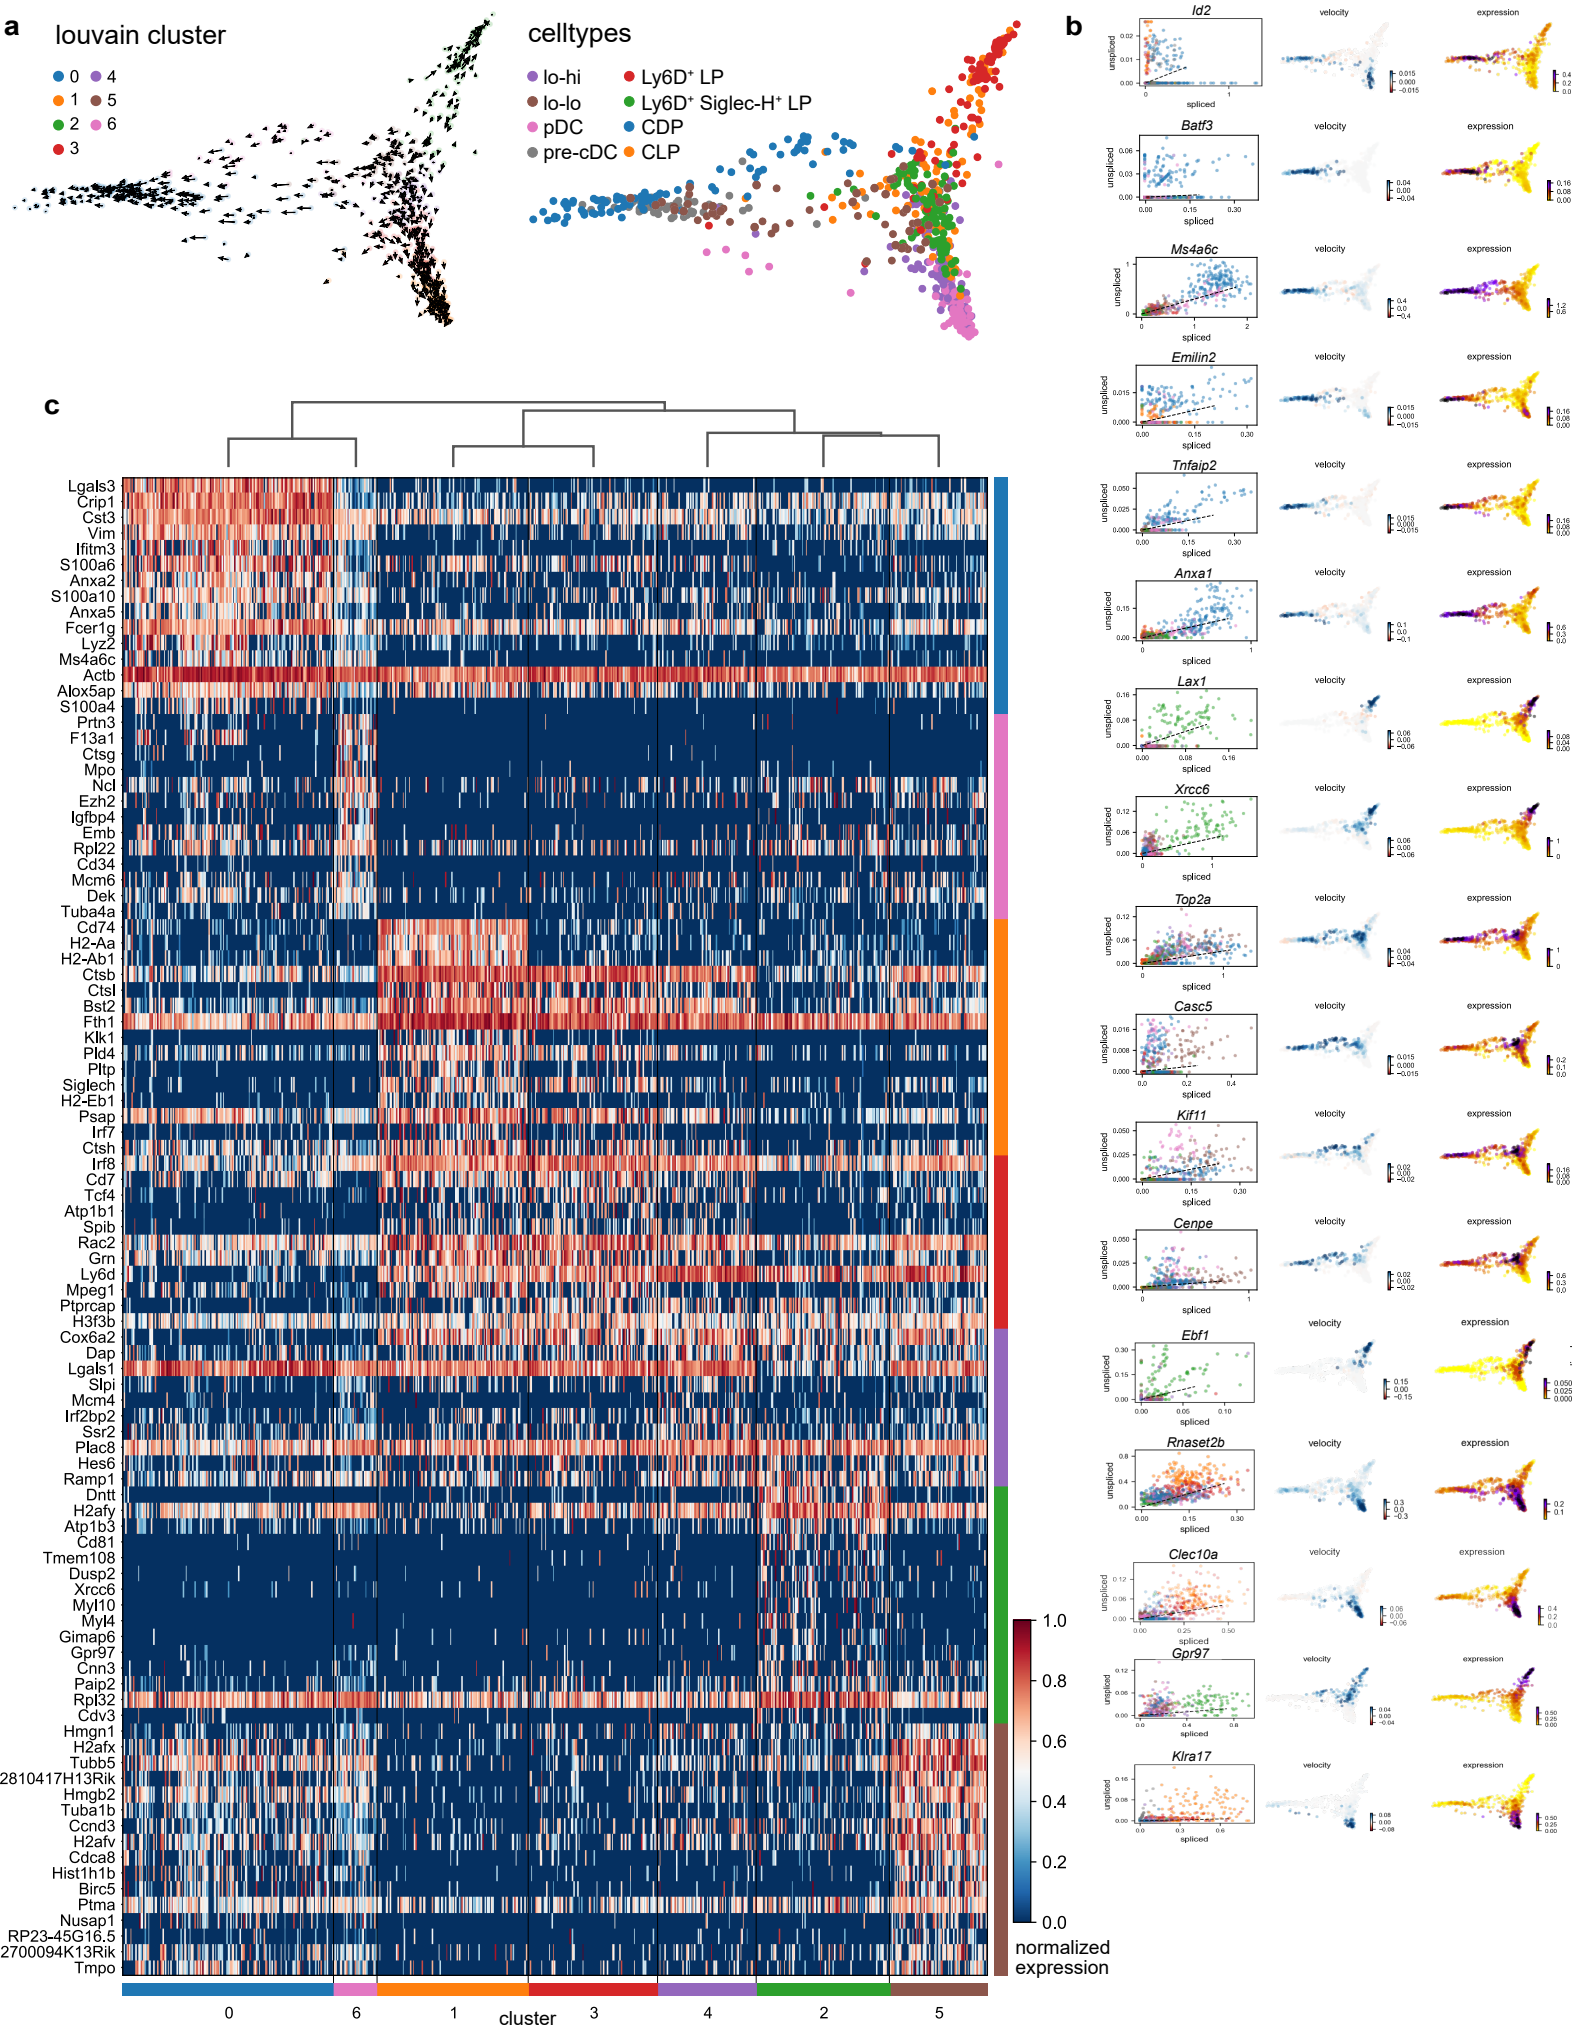

**Supplementary Figure 4. Transcriptional dynamics of DC progenitor cells in murine BM** (a) Clusters were identified by Louvain community detection and cells were highlighted in their respective cluster colours on the diffusion map (left) or highlighted in their respective sorted identity (right). Arrows illustrate calculated RNA velocity on a single-cell level. Longer arrows indicate higher velocity. (b) Spliced/unsliced ratios, velocity and expression of selected genes indicated by colours. (c) Heatmap of top 15 ranked velocity driving genes per cluster (indicated by corresponding color on the right Y-axis), duplicates excluded. Expression values normalized between 0 and 1.

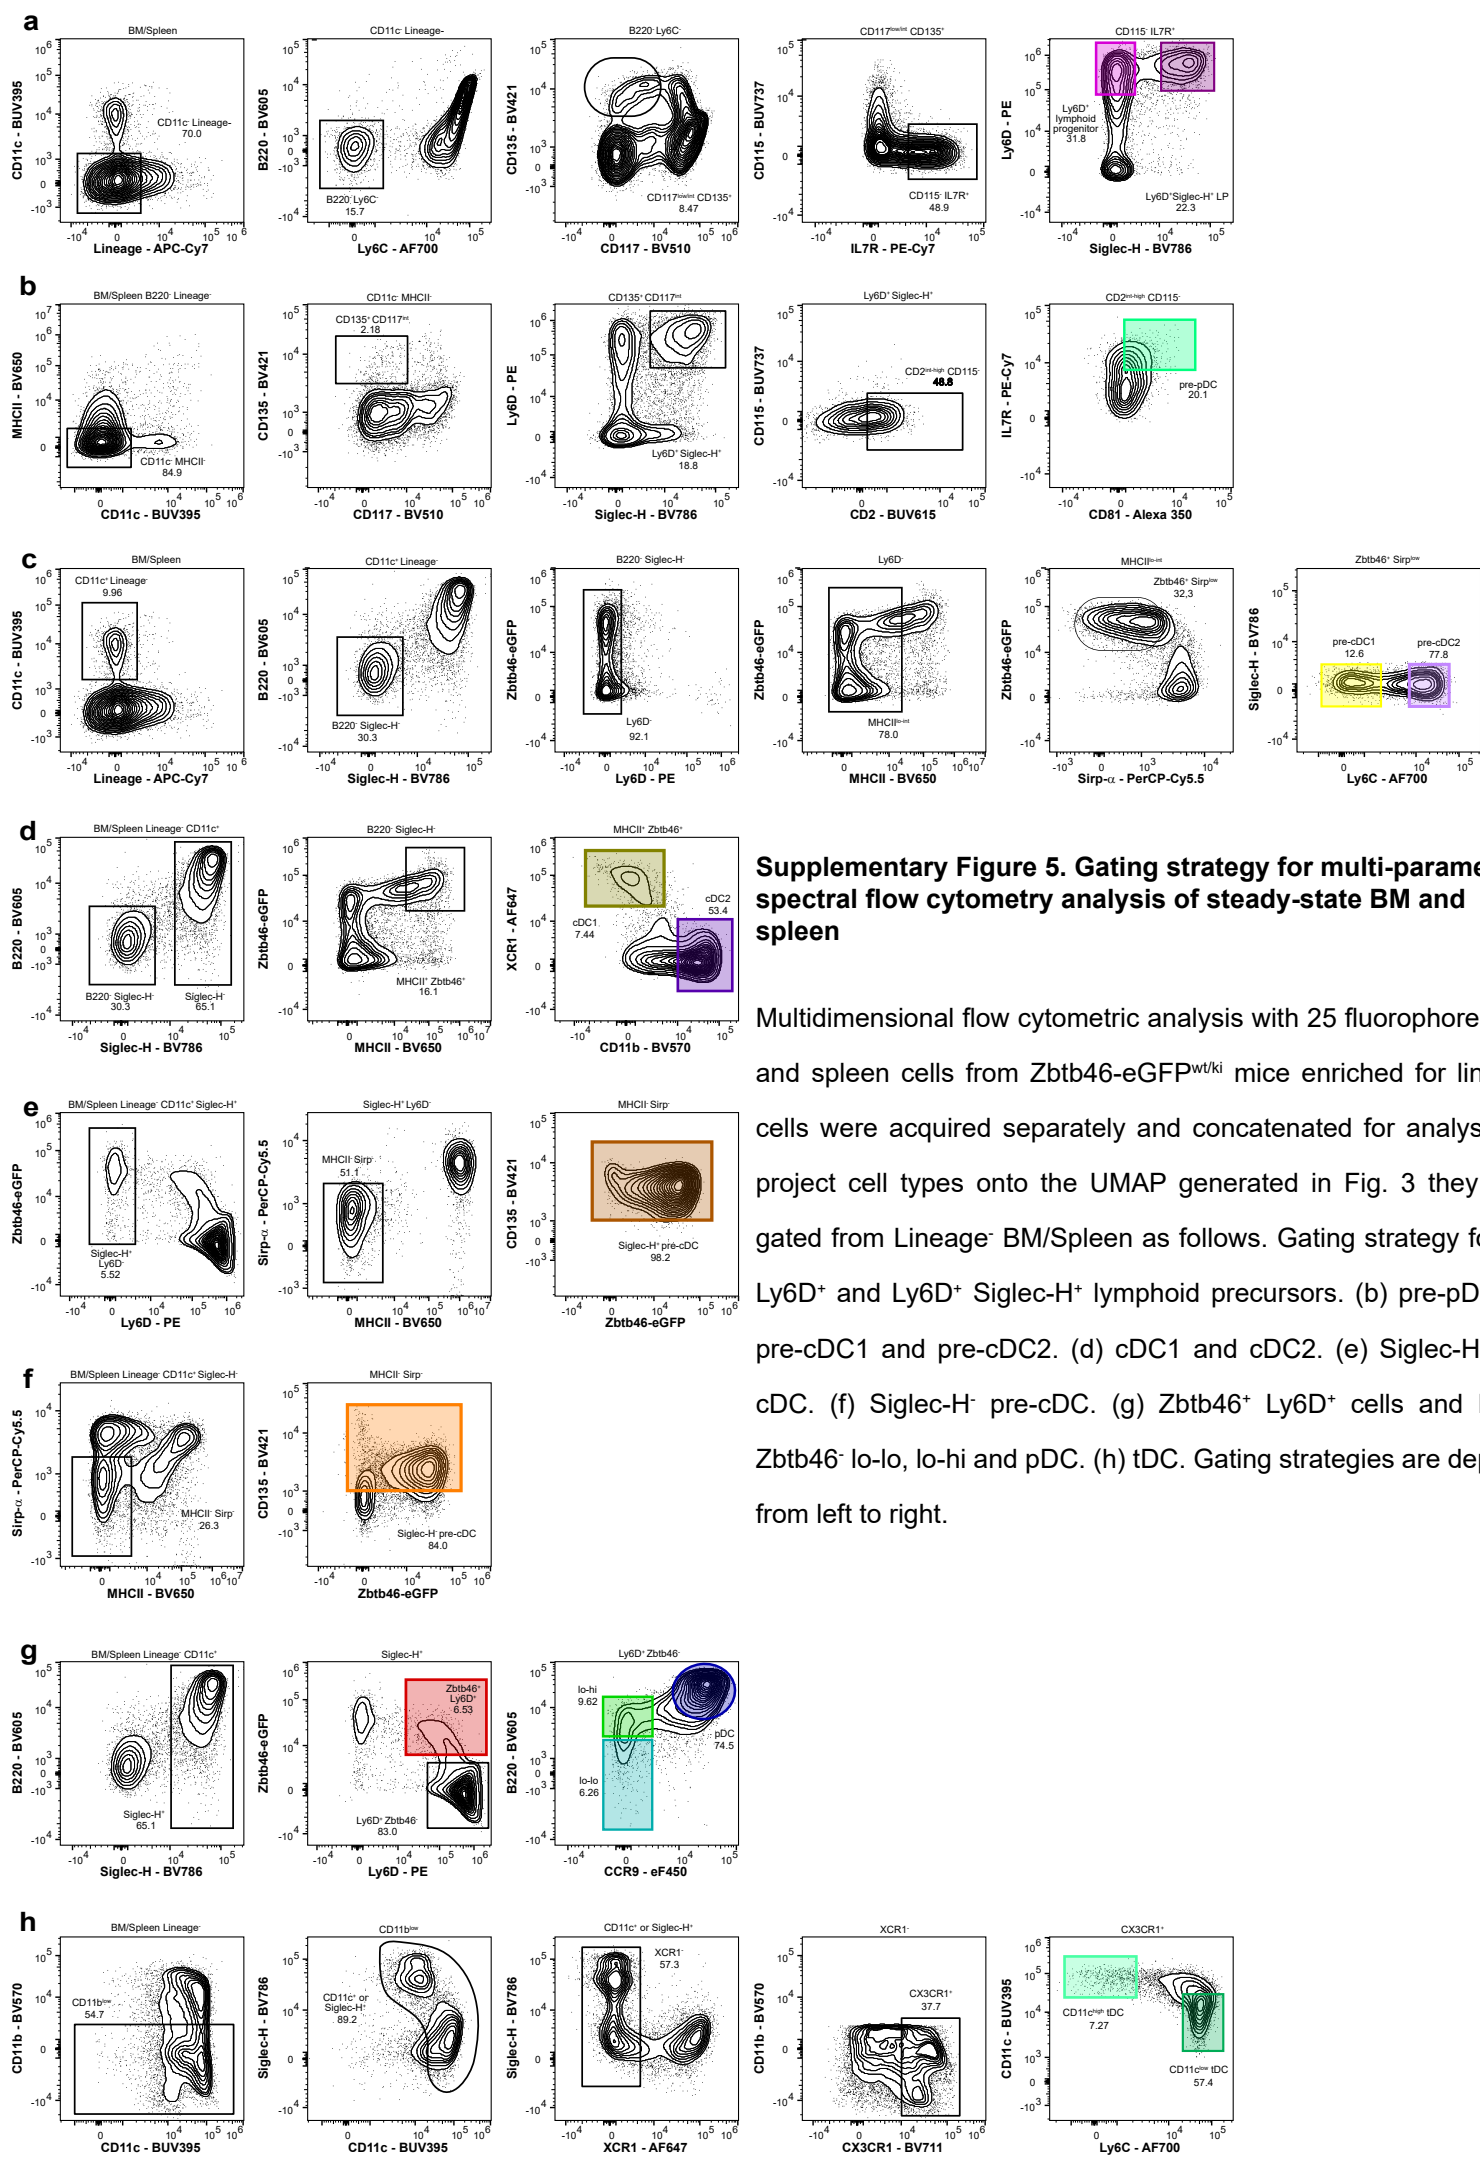



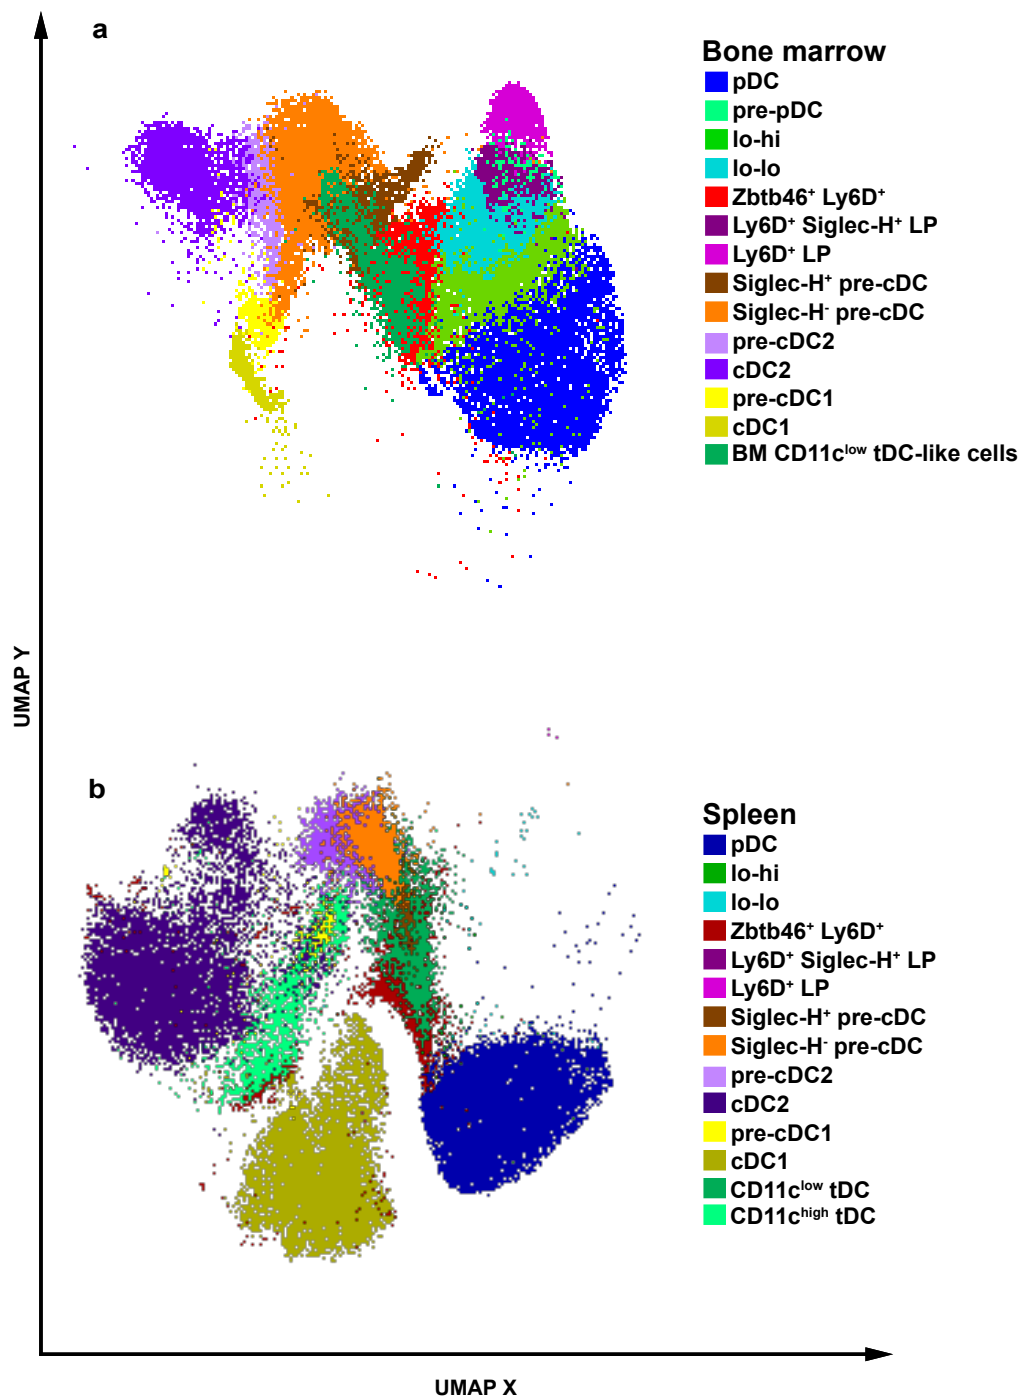

**Supplementary Figure 6. Phenotypic relation of DC subsets and DC precursors in BM and spleen.** Lineage-depleted BM and spleen cells of Zbtb46-eGFP<sup>wt/ki</sup> mice were analysed by multidimensional spectral flow cytometry (25 parameters). (a) Manually gated BM DC subsets, precursors and Zbtb46<sup>+</sup> Ly6D<sup>+</sup> cells projected onto the UMAP of Fig. 3c, top. (d) Splenic DC subsets, precursors and tDC (for gating see Fig. S8) projected onto the UMAP of Fig 3c, bottom.

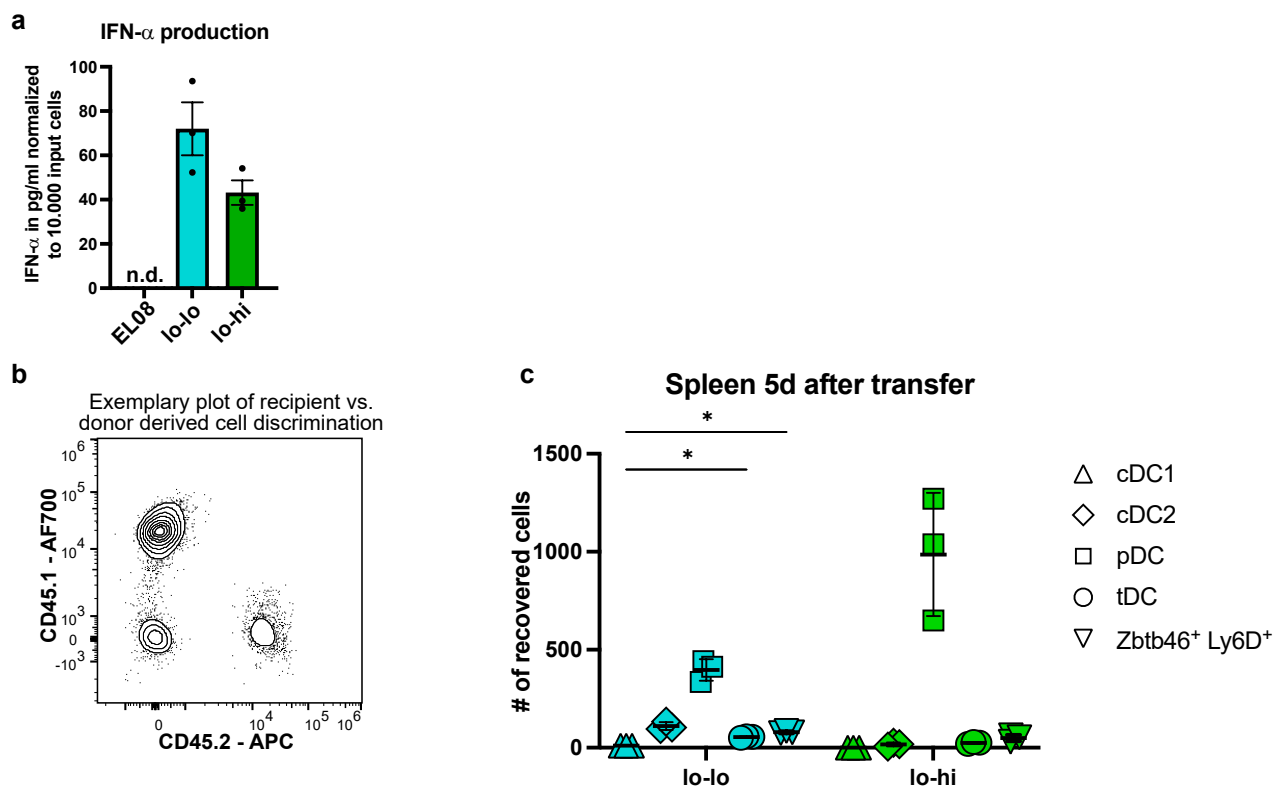

### Supplementary Figure 7. Function of generated pDC and in vivo fate of pDC precursor cells

(a) Ly6D<sup>+</sup> Zbtb46<sup>-</sup> lo-lo and lo-hi cells were sorted from BM of Zbtb46-eGFP<sup>wt/ki</sup> mice (male, C57BL/6 background, 9-15 weeks old), cultured for 3d on EL08-1D2 stromal cells and stimulated with 0.5  $\mu$ M CpG-A for 24h. SN was collected and IFN- $\alpha$  concentrations were measured by ELISA. Normalised IFN production is shown as mean  $\pm$  SEM (n=3, n.d. = not detectable). Ly6D<sup>+</sup> Zbtb46<sup>-</sup> lo-lo and lo-hi cells were sorted from BM of Zbtb46-eGFP<sup>wt/ki</sup> mice (C57BL/6 background, female, 8-12 weeks) and injected i.v. into the tails of CD45.1 congenic mice (*Ptprc*<sup>a</sup>, C57BL/6 background, male, 8-10 weeks). On d5 after injection recipient mice were sacrificed, Spleens were harvested and analyzed by flow cytometry. Injected cells were identified by CD45.2 expression (b, cells enriched for donor derived cells for better resolution). (c) Recovered pDC, cDC1, cDC2, tDC and Zbtb46<sup>+</sup> Ly6D<sup>+</sup> cell counts are shown with mean  $\pm$  SEM (n=3). Counts were compared for each input population using a 2-Way ANOVA with Holm-Šidák correction for multiple testing (adjusted p-values: <.05(\*)).

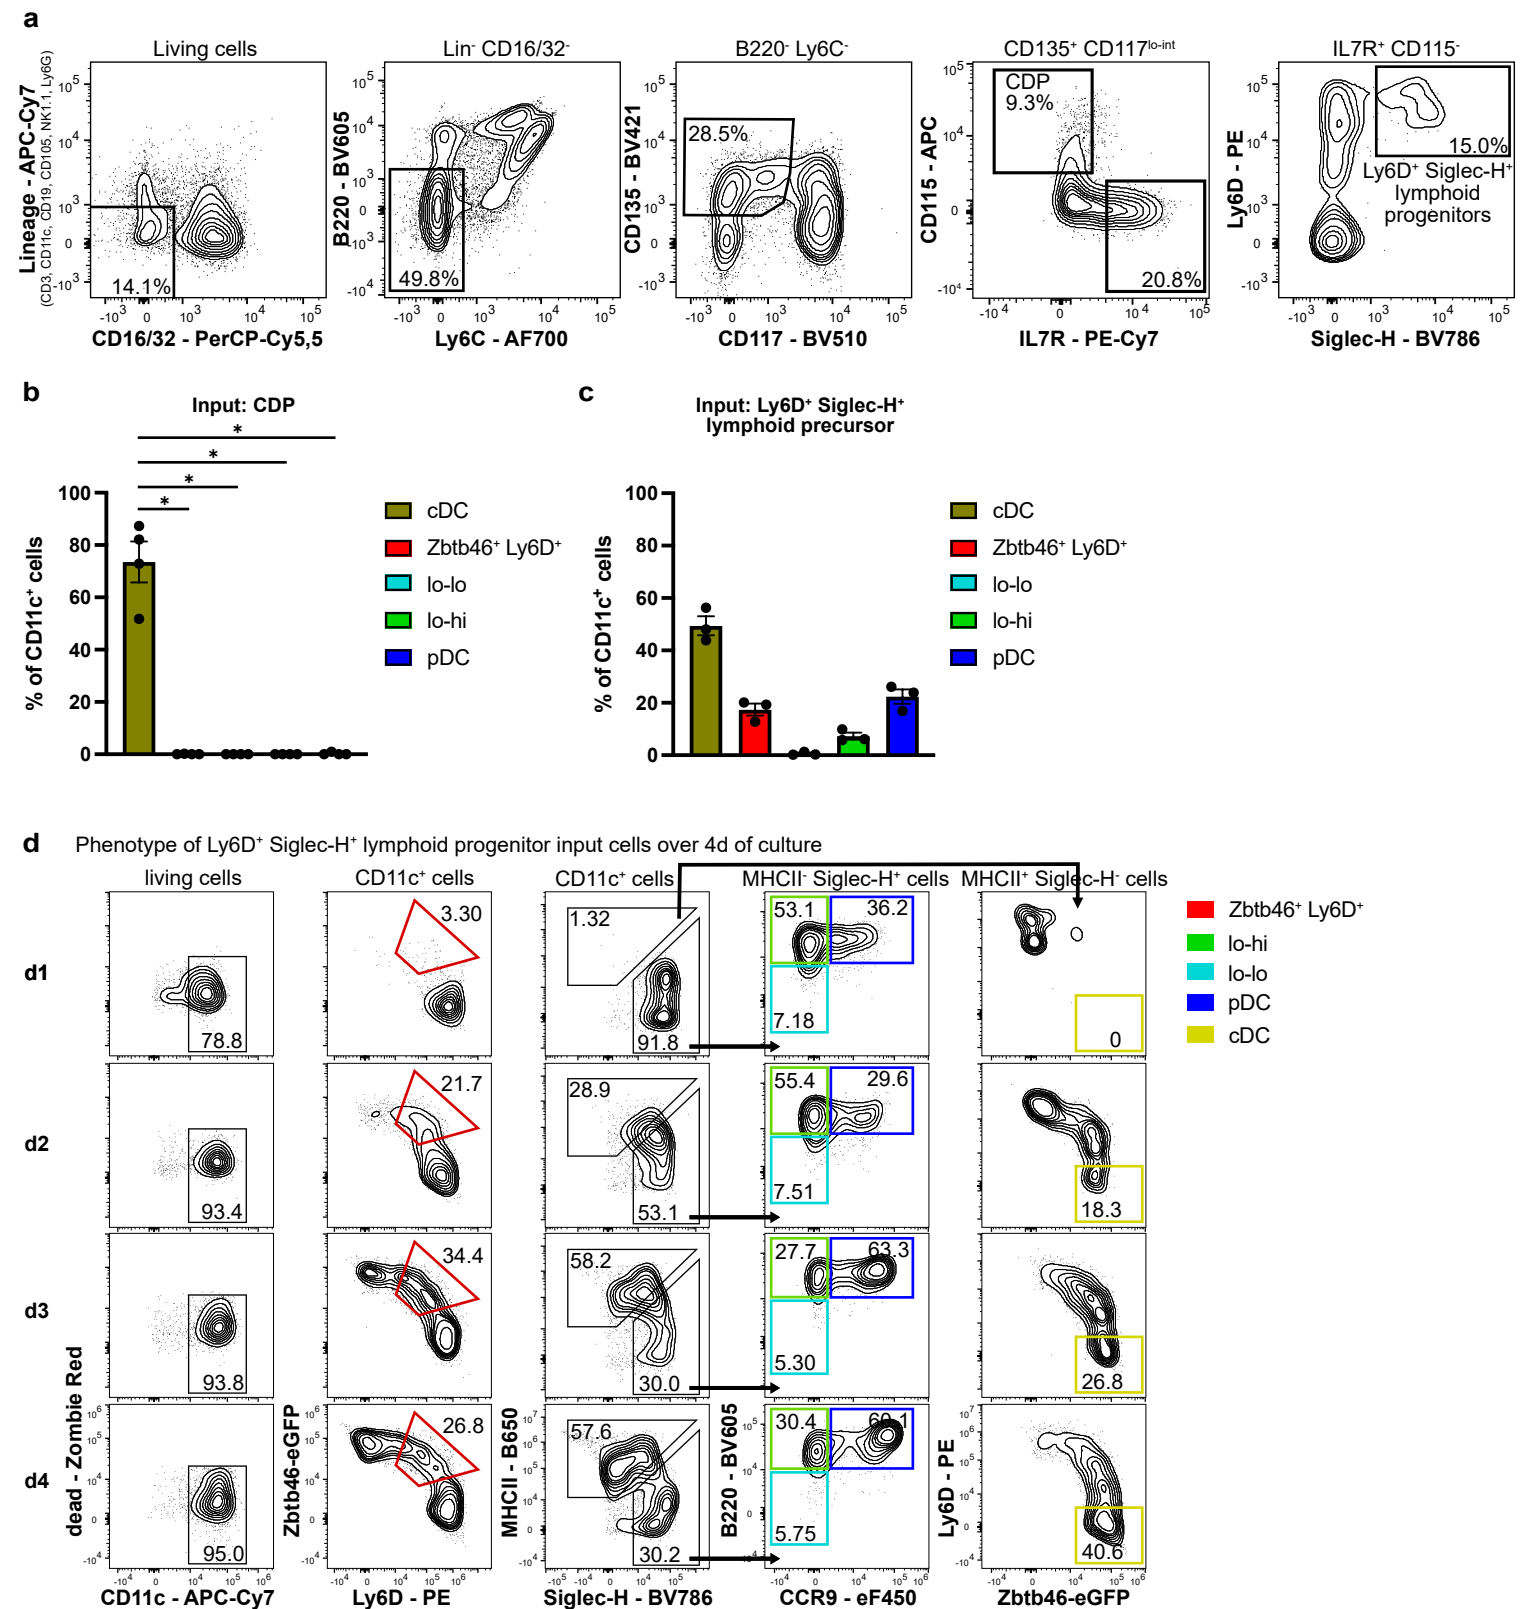

### Supplementary Figure 8. Cell fate of earlier precursor cells

(a) Gating strategies for CDP and Ly6D<sup>+</sup> Siglec-H<sup>+</sup> lymphoid progenitor sorts. (b) Cell fate of CD115<sup>+</sup> IL7R<sup>-</sup> CDP cultured for 4d on EL08-1D2 stromal cells with Flt3L shown as percentage of total CD11c<sup>+</sup> cells as mean  $\pm$  SEM (n=4). Cell type output was compared using paired, two-sided t-tests with Holm-Šidák correction for multiple testing (adjusted p-values: <0.05(\*)). (c) Cell fate of Ly6D<sup>+</sup> Siglec-H<sup>+</sup> lymphoid precursors cultured with 10% Flt3L containing SN without stromal cells for 4d, shown as percentage of total CD11c<sup>+</sup> cells as mean  $\pm$  SEM (n=3). (d) Phenotype kinetics of cells generated by Ly6D<sup>+</sup> Siglec-H<sup>+</sup> lymphoid precursor cells as input, cultured with 10% Flt3L over the course of 4d.

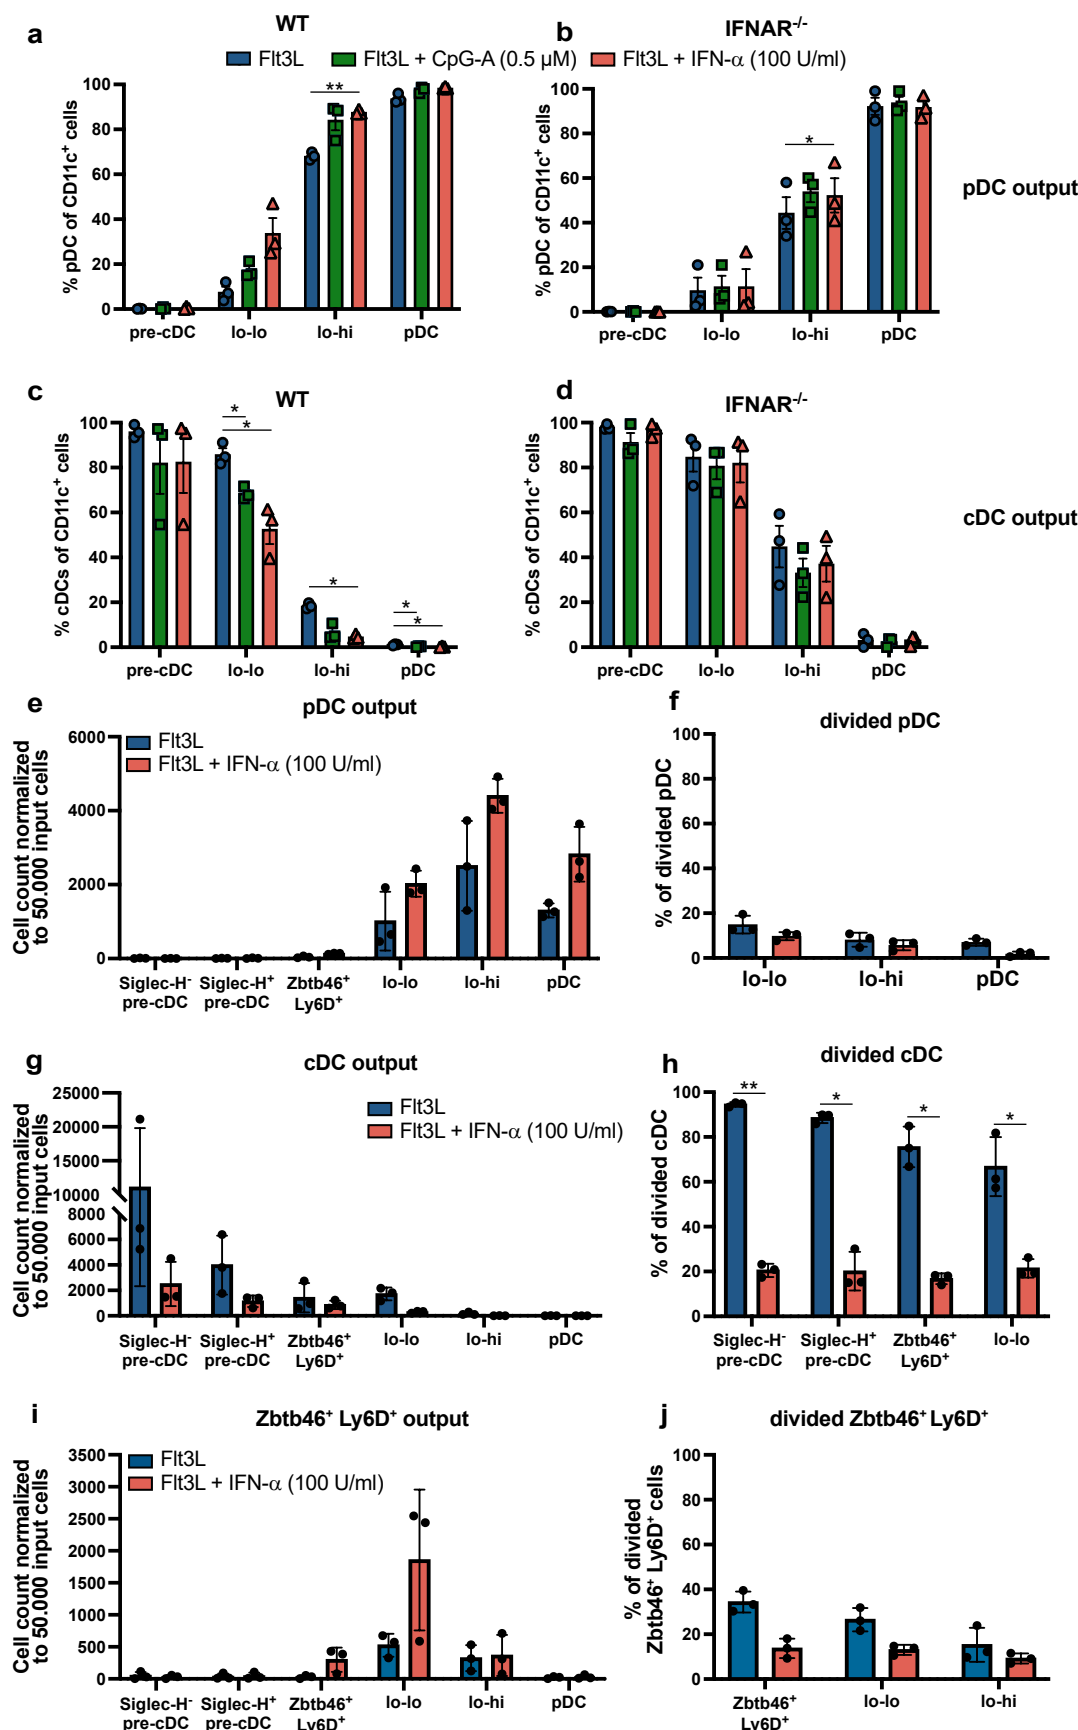

# Supplementary Figure 9. Effects of stimulation on DC precursor cell output and proliferation

Siglec-H<sup>-</sup> pre-cDC and lo-lo, lo-hi and pDC were sorted from Lineage-depleted BM cells from WT mice (a, c) or IFNAR<sup>-/-</sup> mice (b, d) and cultured on EL08 cells with Flt3L alone or with CpG or Type I IFN. Percentages of pDCs (a, b) and cDCs (c, d) are shown as mean ± SEM (n=3). (e, g, i) Siglec-H<sup>-</sup> pre-cDC, Siglec-H<sup>+</sup> pre-cDC, Siglec-H<sup>-</sup> Zbtb46<sup>+</sup> Ly6D<sup>+</sup> cells and lo-lo, lo-hi and pDC (gated Siglec-H<sup>+</sup> Zbtb46<sup>-</sup> Ly6D<sup>+</sup>) were sorted from Lineage-depleted pooled BM cells of Zbtb46-eGFP<sup>wt/ki</sup> mice and cultured for 3 days with Flt3L on EL08-1D2 stromal cells with or w/o addition of IFN I (n=3). The phenotype was analyzed by flow cytometry. Cell counts (normalized to 50,000 input cells) are shown for pDC (e), cDC (g), and Zbtb46<sup>+</sup> Ly6D<sup>+</sup> cells (i) as mean ± SEM (n=3). Cells were labelled with CellTrace Blue proliferation dye before the sort. Divided and undivided cells were gated for pDC (f), cDC (h) and Zbtb46<sup>+</sup> Ly6D<sup>+</sup> cells in Flt3L and Flt3L + IFN-α condition and percentages are shown as mean ± SEM (n=3). Stimulation conditions were compared with medium condition for each input population using paired, two-sided t-tests with Holm-Šidák correction for multiple testing (adjusted p-values: <.05(\*), <.005(\*\*)). (k) Two potential models explaining pDC and cDC potential in lo-lo cells.

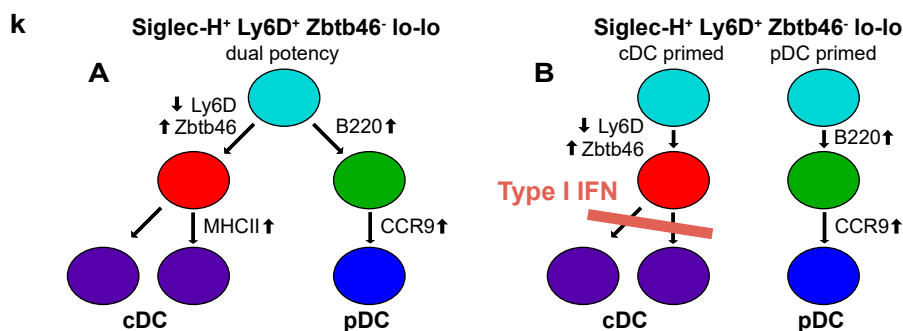

Supplement: MOESM1 [file 41467_2022_31054_MOESM1_ESM.pdf › 41467_2022_31054_MOESM1_ESM.pdf]
